# Supplementary material for: DOCK8 Mutation in Patient with Juvenile Idiopathic Arthritis and Sjögren’s Syndrome
Source: MDPI journal article supplement (doi:10.3390/ijms25042259), 2024-02-13
Supplement: s1 [file s1]

## Supplementary Materials:

**Table S1.** Result of examination of basic lymphocyte subpopulations (2023).

| Cells Subpopulation Phenotype | Absolute Values<br>(thousands/mL) | Healthy Range | Percentage Values | Healthy Range  |
|-------------------------------|-----------------------------------|---------------|-------------------|----------------|
| CD45                          | 2,295                             |               | 96,43%            |                |
| CD3                           | 1,964                             | 1,428 – 1,785 | 82,55%            | 60,00 – 75,00% |
| CD19                          | 0,290                             | 0,142 – 0,404 | 12,19%            | 6,00 – 17,00%  |
| NK                            | 0,072                             | 0,285 – 0,554 | 3,03%             | 12,00 – 22,30% |
| NKT                           | 0,112                             | 0,023 – 0,119 | 4,73%             | 1,00 – 5,00%   |
| CD4/CD3                       | 1,125                             | 0,795 – 0,974 | 57,28%            | 40,50 – 49,60% |
| CD8/CD3                       | 0,512                             | 0,567 – 0,785 | 26,07%            | 28,90 – 40,00% |
| CD4:CD8                       | 2,19                              | 0,8 – 2,5     | 2,19%             | 0,8 – 2,5      |
| CD3/CD25                      | 0,132                             |               | 6,72%             |                |
| CD25 among CD3                | 0,010                             |               | 7,6%              |                |
| CD19/CD25                     | 0,002                             |               | 0,87%             |                |
| CD25 among CD19               | 0,011                             |               | 4%                |                |
| CD4/CD25                      | 0,049                             |               | 4,38%             |                |
| CD25 among CD4                | 0,075                             |               | 6,74%             |                |
| CD4/CD25 (high)               | 0,039                             |               | 3,51%             |                |
| CD25 (high)<br>among CD4      | 0,063                             |               | 5,31%             |                |
| CD4/PD1                       | 0,638                             |               | 56,76%            |                |
| CD8/PD1                       | 0,137                             |               | 26,75%            |                |
| Cells subpopulation phenotype | Absolute values<br>(thousands/mL) | Healthy range | Percentage values | Healthy range  |
| CD19/PD1                      | 0,034                             |               | 12,05%            |                |

CD—Complex of differentiation; PD1—Program death factor—1.

**Table S2.** Clinical features of DOCK8 deficiency.

| Main Symptoms                              | Atopic Diseases                  | Autoimmune Manifestations               |
|--------------------------------------------|----------------------------------|-----------------------------------------|
| recurrent respiratory infections           | eczema                           | autoimmune cytopenias* hemolytic anemia |
| persistent viral cutaneous infections*     | food and environmental allergies | systemic lupus erythromatosus           |
| viral infection                            | asthma*                          | uveitis                                 |
| bacterial infections                       | eosinophilic esophagitis         | arthritis*                              |
| other                                      | allergic rhinitis                | vasculitis                              |
| failure of long-term vaccination responses | ↑ IgE levels, eosinophilia       | inflammatory bowel disease              |
| increased risk of cancer*                  | Anaphylaxis (dru allergy*)       | CUN vasculitis                          |
| ↓NK cells*                                 |                                  | glomerulonephritis                      |

\*—symptoms in the presented patient.

## Methodology:

The whole exome sequencing library was prepared using SureSelect XT Library preparation Kit (from Agilent). The sample was sequenced with Illumina technology on NovaSeq6000 sequencer with  $2 \times 100$  bp reads. The obtained QC value was 92.89% for Q30. Demultiplexing of the sequencing reads was performed with Illumina bcl2fast (2.19). Adapter was trimmed with Skewer version 0.2.9 [18]. The reads were aligned to GRCh37/hg19 reference sequence using BWA-MEM. Read duplicates were removed using Picard 2.18.2 (<http://broadinstitute.github.io/picard/>). Variant call was performed with GATK v4.0.3.0 HaplotypeCaller [19] and FreeBayes (v1.2.02-g29c4002). Variants have been annotated with databases: (i) VEP97 [20]: annotations Sift, Polyphen2, (ii) dbNSFPv4.0 [21] annotations: MutationAssessor, MutationTaster, DANN, FATHMM, (iii) ESP6500, (iv) GnomAD, (v) dbSNP, (vi) ClinVar and (vii) 1,000 Genomes. CNV analysis was performed using XHM [22].
